# Supplementary material
Source: PubMed Central journal article supplement (PMC5750853)
Supplement: supp_RA117.000217_4821_1_supp_6590_qwk2m0.pdf [file supp_RA117.000217_4821_1_supp_6590_qwk2m0.pdf]

**Characterization of the molecular mechanisms underlying  
Glucose Stimulated Insulin Secretion from freshly isolated  
pancreatic beta cells using PTMomics**

Taewook Kang<sup>1,\*</sup>, Pia Jensen<sup>1,\*</sup>, Honggang Huang<sup>1</sup>, Gitte Lund Christensen<sup>2</sup>, Nils Billestrup<sup>2</sup>,  
Martin R. Larsen<sup>1,¶</sup>

<sup>1</sup>Department of Biochemistry and Molecular Biology, PR group, University of Southern Denmark, Odense, Denmark; <sup>2</sup>Department of Biomedical Sciences, University of Copenhagen, 2200 Copenhagen N, Denmark.

\*Shared first author

¶**To whom correspondence should be addressed:** Department of Biochemistry and Molecular Biology, University of Southern Denmark, Denmark. Campusvej 55, Odense 5230 Denmark. Tel.: +45-60-111872; E-mail: [mrl@bmb.sdu.dk](mailto:mrl@bmb.sdu.dk).

**Supplemental Figure 1.**

**A**

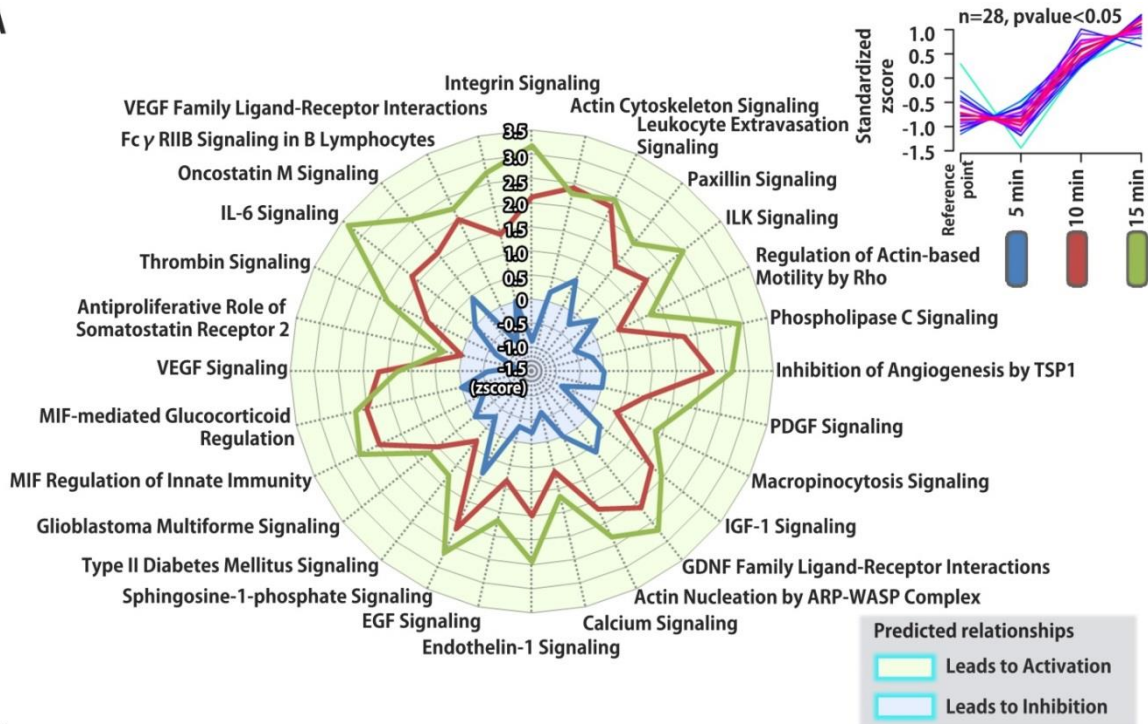

**B**

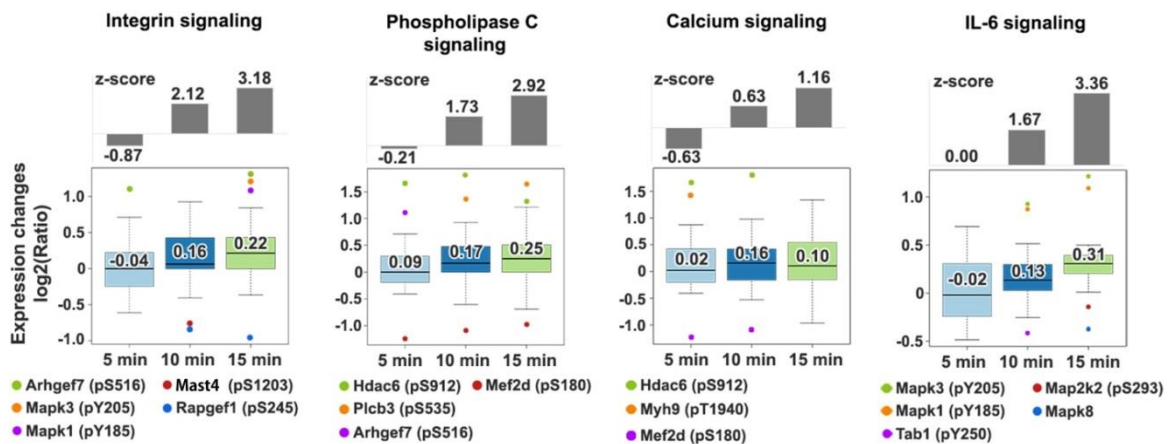

**Supplemental Figure 1. Mapping of affected canonical pathways by glucose stimulated insulin release from beta cells.** (A) Affected canonical signaling pathways in rat pancreatic islets after 5 min, 10 min or 15 min high glucose stimulation on the proteome, phosphoproteome and sialylome using Ingenuity Pathway Analysis (IPA) software are shown as a radar chart. The pathways shown in the radar chart are based on one of three dynamic pathway patterns found from the activation or inhibition z-scores. The pattern is illustrated as a cluster in the right corner. (B) The regulated molecules of four representative signaling pathways were evaluated using interquartile range (IQR) test with significant z-scores (Inhibition < -2 or 2 < Activation).

**Supplemental Figure 2.**

**A**

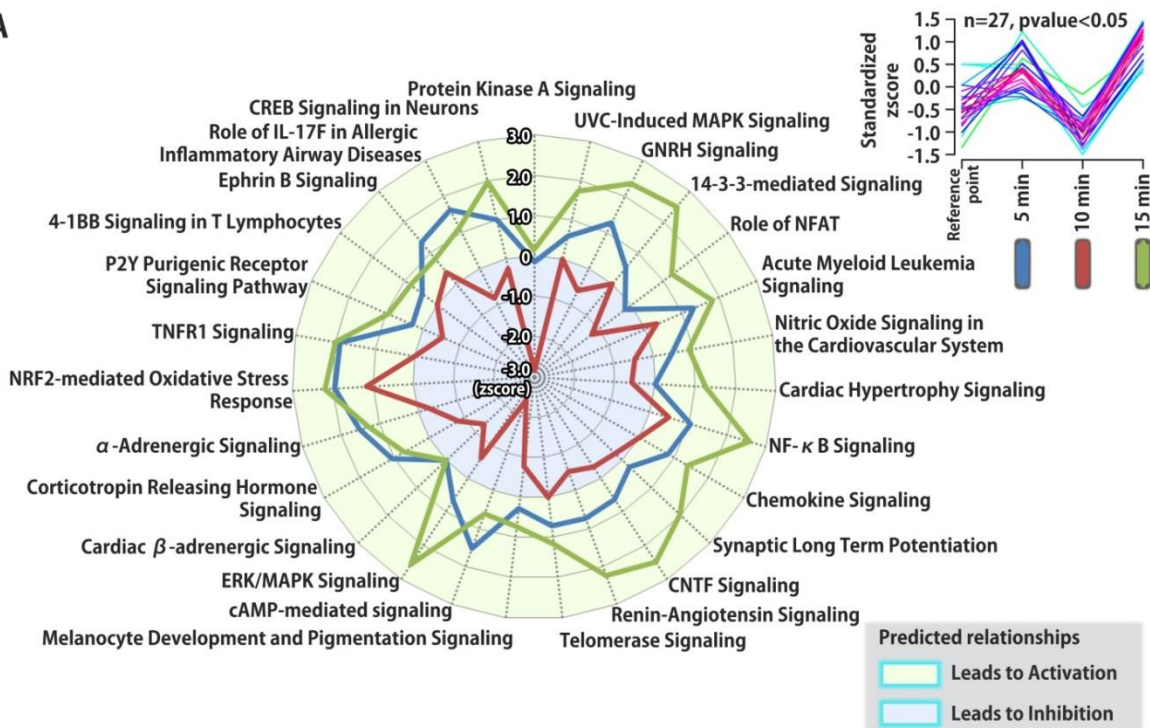

**B**

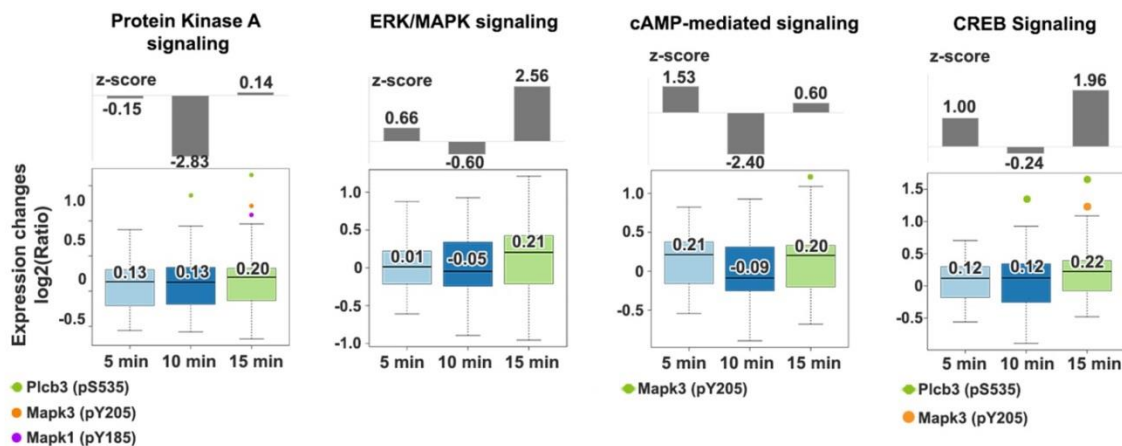

**Supplemental Figure 2. Mapping of affected canonical pathways by glucose stimulated insulin release from beta cells.** (A) Affected canonical signaling pathways in rat pancreatic islets after 5 min, 10 min or 15 min high glucose stimulation on the proteome, phosphoproteome and sialylome using Ingenuity Pathway Analysis (IPA) software are shown as a radar chart. The pathways shown in the radar chart are based on one of three dynamic pathway patterns found from the activation or inhibition z-scores. The pattern is illustrated as a cluster in the right corner. (B) The regulated molecules of four representative signaling pathways were evaluated using interquartile range (IQR) test with significant z-scores (Inhibition < -2 or 2 < Activation).

**Supplemental Figure 3.**

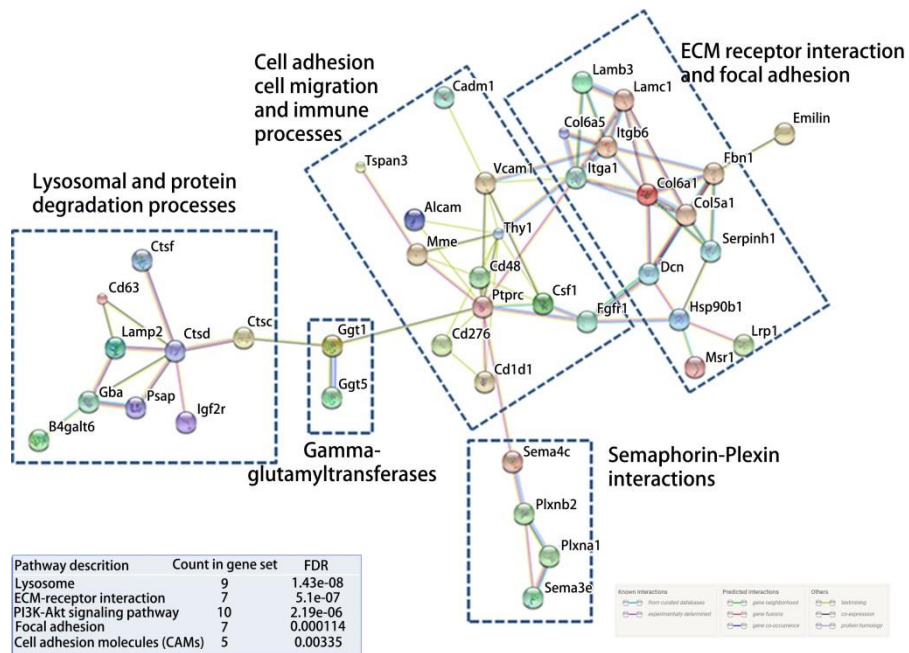

**Supplemental Figure 3.** Functional interaction network of significantly sialylated proteins after high glucose stimulation according to STRING network analysis. (Small nodes: protein of unknown 3D structure. Large nodes: some 3D structure is known or predicted.)
